# Supplementary material for: Moonlighting Cytosolic Function of ACAD9: Suppression of TRAF6-Mediated Osteoclastogenesis and Protection Against Osteoporosis
Source: Research Square preprint supplement (doi:10.21203/rs.3.rs-6626293/v1), 2025-08-07
Supplement: Supplementary file 1 [file 1d3d33e4896d7a772f4e6be1.pdf]

## **Supplemental Materials**

### **Moonlighting Cytosolic Function of ACAD9: Suppression of TRAF6-Mediated Osteoclastogenesis and Protection Against Osteoporosis**

Mimi Wang <sup>a</sup>, Chao Yuan <sup>a</sup>, Yi Zhang <sup>a</sup>, MengMeng Peng <sup>a</sup>, Yundie Liu <sup>a</sup>, Ruolin Liu <sup>b</sup>, Zhaode Feng <sup>a</sup>, Zhiwei Yang <sup>c</sup>, Hao Li <sup>a</sup>, Zhongbo Liu <sup>b</sup> and Ying Cheng <sup>a,\*</sup>

<sup>a</sup> Center for Mitochondrial Biology & Medicine, Key Laboratory of Biomedical Information Engineering of Ministry of Education, School of Life Science and Technology, Xi'an Jiaotong University, Xi'an, China.

<sup>b</sup> Key Laboratory of Shaanxi Province for Craniofacial Precision Medicine Research, Laboratory Center of Stomatology, College of Stomatology, Xi'an Jiaotong University, Xi'an, China.

<sup>c</sup> MOE Key Laboratory for Nonequilibrium Synthesis and Modulation of Condensed Matter, School of Physics, Xi'an Jiaotong University, Xi'an, China.

\* Corresponding author: Ying Cheng, Email: [yingcheng@xjtu.edu.cn](mailto:yingcheng@xjtu.edu.cn)

## **Methods**

### **Cell culture and NAC treatments**

For in vitro osteoclastogenesis, seeded cells in 12-well plates and the medium supplemented with 100ng/ml RANKL for differentiation under cells reached confluence, and the differentiation medium was changed every 2 days. For the N-acetyl-L-cysteine (NAC) intervention experiment, during the osteoclastogenesis, pretreated cells with NAC(5 $\mu$ M) or not and conducted other detection experiments.

### **Functional enrichment analysis**

The pathway terms categorized by the Kyoto Encyclopedia of Genes and Genomes (KEGG) Pathway Database and Gene Ontology (GO) Process were collected. Osteoporosis-related biological terms were selected, and the matching genes were counted.

**Supplemental Table 1**

| gene               | forward                          | reverse                      |
|--------------------|----------------------------------|------------------------------|
| <i>Cathepsin K</i> | 5'- ccgaataaatctagcacccttagt-3'  | 5'- gaaacttgaacacccacatcc-3' |
| <i>c-Src</i>       | 5'-tgagccaggatctgaacca-3'        | 5'-Tcctgctccgtgtcccta-3'     |
| <i>RANK</i>        | 5'-caggacagggtgatgagag-3'        | 5'-ttactgttccagtcacgttcc-3'  |
| <i>Traf6</i>       | 5'-ttgcacattcagtgttttgg-3'       | 5'-tgcaagtgtcgtgccaag-3'     |
| <i>Nfatc1</i>      | 5'-tccaaagtcatttctgtgga-3'       | 5'-ctttgcttccatctcccaga-3'   |
| <i>c-Fos</i>       | 5'-gggacagccttctactacc-3'        | 5'-agatctgcgcaaaagtcctg-3'   |
| <i>Fra-1</i>       | 5'-cccagtacagtccccctca-3'        | 5'-tcctcctctgggctgatct-3'    |
| <i>Trap</i>        | 5'-gagtcagactaatgtcatctgtggtt-3' | 5'-accccgaaaatggtgatg-3'     |
| <i>β-actin</i>     | 5'-cgctgtcaacccaagtt-3'          | 5'-ggcacgttctgtctactcgt-3'   |
| <i>Acad9</i>       | 5'-cgcagcctctgcctaac3'           | 5'-cgtagctctggtctggatgg-3'   |

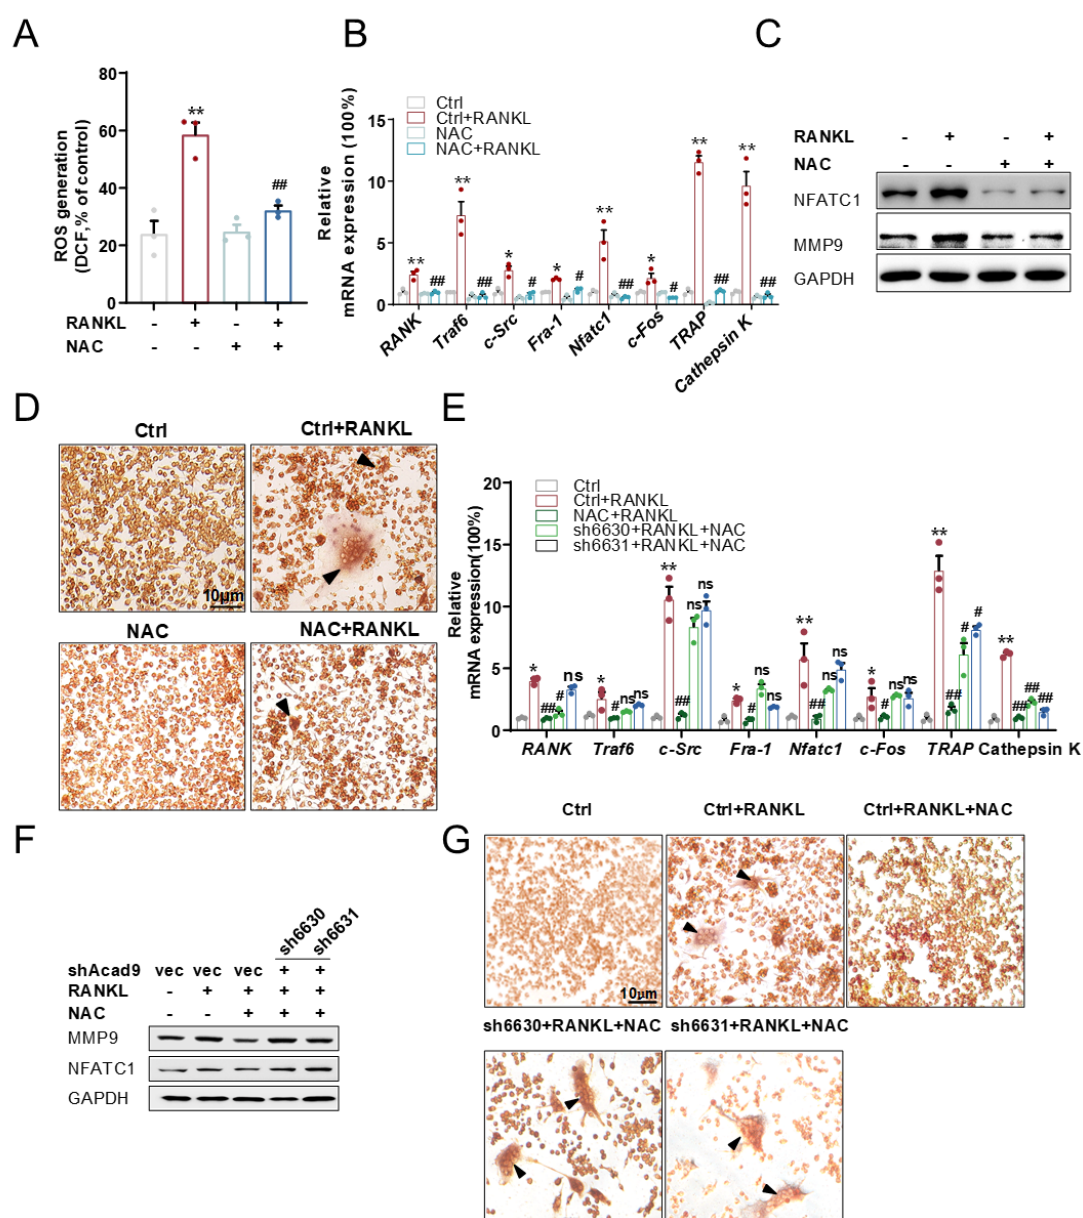

**Fig. S1: Clearing ROS alone does not completely inhibit osteoclast differentiation and maturation due to loss of ACAD9 function.** (A) ROS levels were detected using DCFH2-DA, (B) the relative mRNA levels of RANKL, Traf6, c-src, Fra-1, NFATc1, c-fos, TRAP, and cathepsin K were tested by qRT-PCR, (C) the levels of relative osteoclast differentiation marker protein NFATc1 and MMP9 were detected by western blot and (D) TRAP staining was performed from cells pre-treated NAC or not after

induced 4 days.(E) the relative mRNA levels of RANKL, Traf6, c-src, Fra-1, NFATc1, c-fos, TRAP, and cathepsin K were tested by qRT-PCR, (F) the levels of relative osteoclast differentiation marker protein NFATc1 and MMP9 were detected by western blot and (G) TRAP staining was performed from cells that stably knockdown ACAD9 pre-treated with NAC or not after induced 4 days.

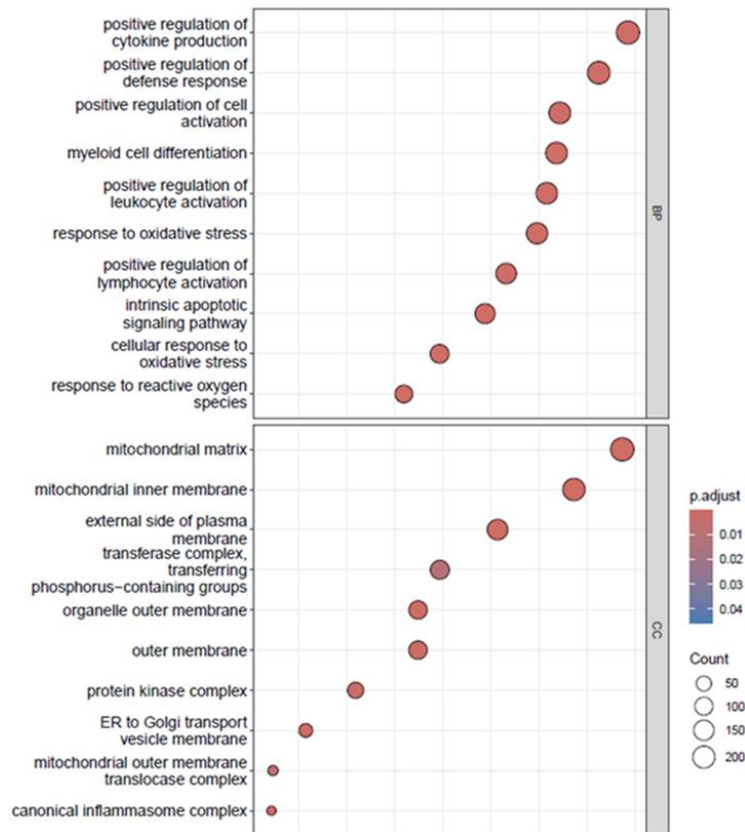

**Fig. S2: ACAD9 is related to the composition of the mitochondrial inner membrane.** (A) Gene Ontology (GO) enrichment analyses and functional annotations.

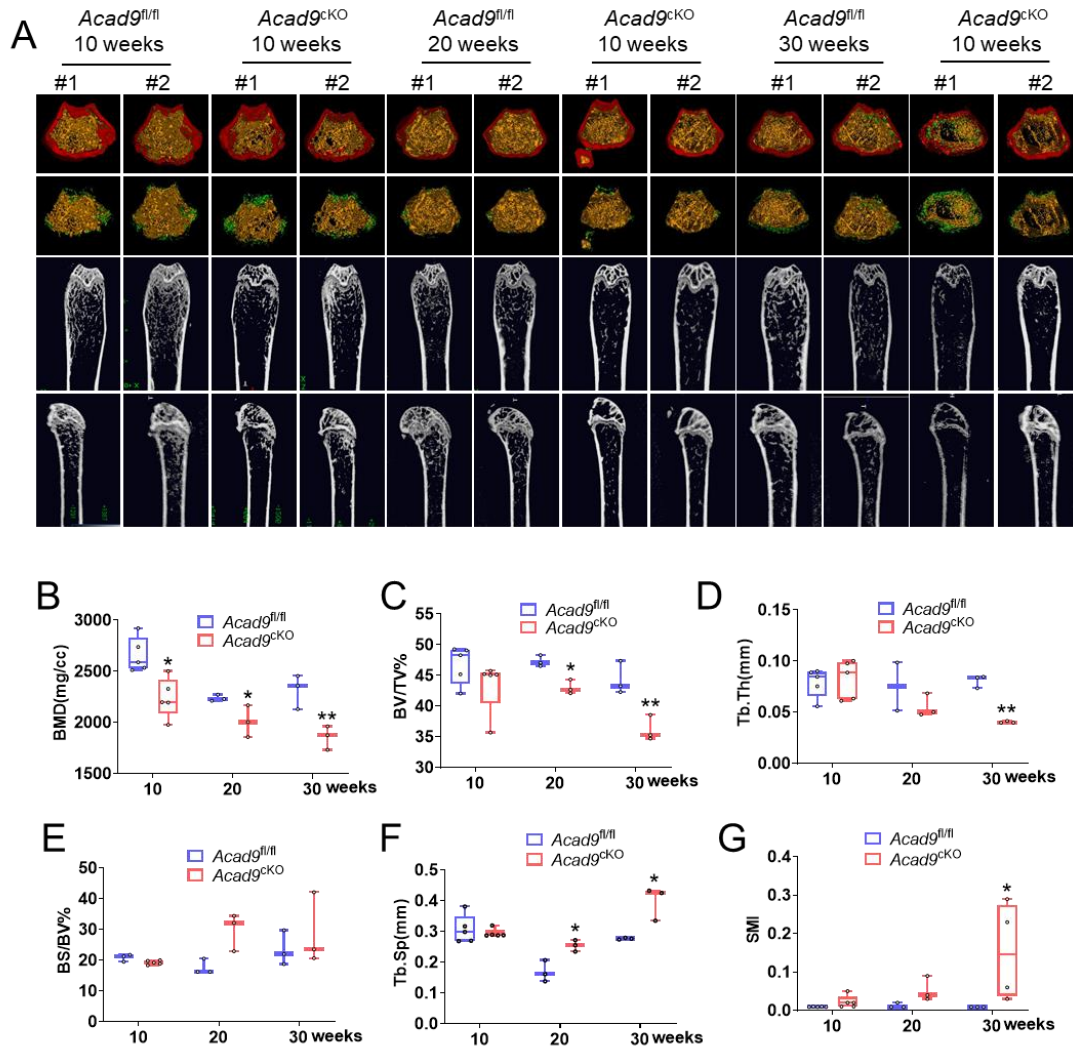

**Fig. S3: Osteoclast precursors loss of *Acad9* provoke osteoporosis in male mice.** Micro-CT images of the femurs of *Acad9<sup>fl/fl</sup>* and *Acad9<sup>cKO</sup>* male mice over time (A). The trabecular bone and architecture analyzed by MicroView v2.1.1 Software: (B) bone mineral density (BMD), (C) bone volume per tissue volume (BV/TV); (D) trabecular thickness (Tb. Th); (E) bone surface to bone volume (BS/BV); (F) trabecular spacing (Tb. Sp); and (G) structure model index (SMI), \* $p < 0.05$ , \*\*  $p < 0.01$  vs *Acad9<sup>fl/fl</sup>* mice.
